# Supplementary material for: AI-supported modified risk staging for multiple myeloma cancer useful in real-world scenario
Source: PubMed Central journal article supplement — Transl Oncol. 2021 Jul 8;14(9):101157. doi: 10.1016/j.tranon.2021.101157 (PMC8278429; doi:10.1016/j.tranon.2021.101157), 2021-07-08
Supplement: mmc1.pdf [file mmc1.pdf]

## Supplementary Tables and Figures

Table S1: Baseline demographic, laboratory and clinical characteristics of multiple myeloma (MM) patients of MMIn and MMRF cohort

| Parameters                       | MMIn ( <i>n</i> = 1070)               |                                      |                                    | MMRF                             |
|----------------------------------|---------------------------------------|--------------------------------------|------------------------------------|----------------------------------|
|                                  | Training Dataset<br>( <i>n</i> = 716) | Testing Dataset<br>( <i>n</i> = 354) | Total (MMIn)<br>( <i>n</i> = 1070) | Test Dataset<br>( <i>n</i> =900) |
| Age (Median, Range;<br>in years) | 57 (19 - 87)                          | 55 (24 - 84)                         | 56(18-87)                          | 62 (27 - 91)                     |
| Male/<br>Female                  | 471 (65.78%)<br>245 (34.22%)          | 239 (67.51%)<br>115 (32.49%)         | 710(66.36%)<br>360(33.64%)         | NA                               |
| Hemoglobin<br>(g/dL)             |                                       |                                      |                                    |                                  |
| <10                              | 404 (56.42%)                          | 195 (54.08%)                         | 599 (55.98%)                       | 331 (36.77%)                     |
| ≥10                              | 312 (43.58%)                          | 159 (44.92%)                         | 471 (44.02%)                       | 569 (63.23%)                     |
| Serum albumin<br>(g/dL)          |                                       |                                      |                                    |                                  |
| <3.5                             | 309 (43.16%)                          | 140 (39.55%)                         | 449 (41.96%)                       | 328 (36.44%)                     |
| ≥3.5                             | 407 (56.84%)                          | 214 (60.45%)                         | 621 (58.04%)                       | 572 (63.56%)                     |
| Beta 2 microglobulin<br>(mg/L)   |                                       |                                      |                                    |                                  |
| <5.5                             | 357 (49.86%)                          | 177 (50%)                            | 534 (49.90%)                       | 661 (73.44%)                     |
| ≥5.5                             | 359 (50.14%)                          | 177 (50%)                            | 536 (50.09%)                       | 239 (26.56%)                     |
| Serum LDH<br>(IU/L)              |                                       |                                      |                                    |                                  |
| ≤280                             | 625 (87.29%)                          | 304 (85.88%)                         | 929 (86.82%)                       | 850 (94.44%)                     |
| >280                             | 91 (12.71%)                           | 50 (14.12%)                          | 141 (13.18%)                       | 50 (5.56%)                       |
| Serum creatinine<br>(mg/dL)      |                                       |                                      |                                    |                                  |
| ≤2                               | 550 (76.82%)                          | 280 (79.09%)                         | 830 (77.57%)                       | 816 (90.66%)                     |
| >2                               | 166 (23.18%)                          | 74 (20.91%)                          | 240 (22.43%)                       | 84 (9.34%)                       |
| Serum calcium<br>(mg/dL)         |                                       |                                      |                                    |                                  |
| ≤11                              | 631 (88.13%)                          | 314(88.70%)                          | 935 (87.38%)                       | 831 (92.33%)                     |
| >11                              | 85 (11.87%)                           | 40(11.30%)                           | 135 (12.62%)                       | 69 (7.67%)                       |
| ISS 1/2/3                        | 139/216/361                           | 68/107/179                           | 212/325/552                        | 342/319/239                      |
| RISS 1/2/3                       | 23/308/73                             | 24/151/48                            | 32/158/61                          | 107/505/91                       |

Table S2: Univariate analysis of Cox Proportional Hazards Model on the training dataset  
( $n=716$ )

| Parameter                           |     | Hazard Ratio | $p >  z $ | 95% CI      | $\chi^2$ |
|-------------------------------------|-----|--------------|-----------|-------------|----------|
| Age<br>( $67 \leq, >67$ )           | PFS | 1.41         | 0.017     | 1.06 - 1.87 | 5.24     |
|                                     | OS  | 1.95         | 3.00e-05  | 1.42 - 2.65 | 15.29    |
| Albumin<br>( $>3.6, \leq 3.6$ )     | PFS | 1.18         | 0.08      | 0.97 - 1.43 | 2.9      |
|                                     | OS  | 1.45         | 0.0029    | 1.13 - 1.84 | 9.04     |
| $\beta 2M$<br>( $<4.8, \geq 4.8$ )  | PFS | 1.56         | 6.84e-06  | 1.29 - 1.89 | 20.5     |
|                                     | OS  | 1.95         | 1.40e-07  | 1.52 - 2.50 | 28.74    |
| Calcium<br>( $<11.13, \geq 11.13$ ) | PFS | 1.47         | 0.007     | 1.11 - 1.95 | 6.61     |
|                                     | OS  | 1.46         | 0.03      | 1.03 - 2.04 | 4.3      |
| eGFR<br>( $>48.1, \leq 48.1$ )      | PFS | 1.29         | 0.013     | 1.05 - 1.58 | 5.99     |
|                                     | OS  | 1.49         | 0.0013    | 1.16 - 1.91 | 9.97     |
| Hb<br>( $>12.3, \leq 12.3$ )        | PFS | 1.69         | 6.00e-04  | 1.25 - 2.28 | 13.56    |
|                                     | OS  | 2.26         | 1.90e-04  | 1.47 - 3.47 | 17.52    |

Table S3: Evaluation of progression free survival (PFS) and overall survival (OS) in the risk categories defined by staging methods- MRS, ISS and RISS on the MMIn dataset

| Comparison of MRS vs ISS ( $n = 1070$ patients) |                     |                      |                      |                      |                            |                      |                      |                      |                           |
|-------------------------------------------------|---------------------|----------------------|----------------------|----------------------|----------------------------|----------------------|----------------------|----------------------|---------------------------|
|                                                 |                     | MRS-1                | MRS-2                | MRS-3                | MRS p-value                | ISS-1                | ISS-2                | ISS-3                | ISS p-value               |
| Training data<br>( $n=716$ )                    | Median PFS in weeks | 243<br>( $n = 185$ ) | 186<br>( $n = 332$ ) | 129<br>( $n = 199$ ) | <b>6.28</b><br><b>e-6</b>  | 229<br>( $n = 139$ ) | 219<br>( $n = 216$ ) | 147<br>( $n = 361$ ) | 1.25<br><b>e-5</b>        |
|                                                 | Median OS in weeks  | 592<br>( $n = 185$ ) | 341<br>( $n = 332$ ) | 219<br>( $n = 199$ ) | <b>8.15</b><br><b>e-10</b> | 490<br>( $n = 139$ ) | 489<br>( $n = 216$ ) | 285<br>( $n = 361$ ) | 2.03<br><b>e-5</b>        |
| Test data<br>( $n=354$ )                        | Median PFS in weeks | 234<br>( $n = 96$ )  | 144<br>( $n = 179$ ) | 133<br>( $n = 79$ )  | 0.03                       | 234<br>( $n = 68$ )  | 201<br>( $n = 107$ ) | 125<br>( $n = 179$ ) | <b>1.7</b><br><b>e-4</b>  |
|                                                 | Median OS in weeks  | 912<br>( $n = 96$ )  | 301<br>( $n = 179$ ) | 315<br>( $n = 79$ )  | <b>2.3</b><br><b>e-6</b>   | 912<br>( $n = 68$ )  | 454<br>( $n = 107$ ) | 276<br>( $n = 179$ ) | 9.06<br><b>e-6</b>        |
| Comparison of MRS vs RISS ( $n = 627$ patients) |                     |                      |                      |                      |                            |                      |                      |                      |                           |
|                                                 |                     | MRS-1                | MRS-2                | MRS-3                | MRS p-value                | RISS-1               | RISS-2               | RISS-3               | RISS p-value              |
| Median PFS in weeks                             |                     | 212<br>( $n = 160$ ) | 178<br>( $n = 341$ ) | 106<br>( $n = 126$ ) | 4.09<br><b>e-5</b>         | 196<br>( $n = 47$ )  | 186<br>( $n = 459$ ) | 107<br>( $n = 121$ ) | <b>1.59</b><br><b>e-6</b> |
| Median OS in weeks                              |                     | 478<br>( $n = 160$ ) | 341<br>( $n = 341$ ) | 221<br>( $n = 126$ ) | 2.06<br><b>e-8</b>         | 478<br>( $n = 47$ )  | 440<br>( $n = 459$ ) | 191<br>( $n = 121$ ) | <b>4.8</b><br><b>e-9</b>  |

Table S4: Univariate analysis of Cox Proportional Hazards Model for MMIn and MMRF dataset.

| MMIn Dataset ( $n = 1070$ )      |     |              |           |             |          |
|----------------------------------|-----|--------------|-----------|-------------|----------|
| Parameter                        |     | Hazard Ratio | $p >  z $ | 95% CI      | $\chi^2$ |
| Age ( $67 \leq, >67$ )           | PFS | 1.35         | 0.01      | 1.06-1.71   | 5.7      |
|                                  | OS  | 1.92         | 1.92e-06  | 1.46 - 2.51 | 19.65    |
| Albumin ( $>3.6, \leq 3.6$ )     | PFS | 1.19         | 0.02      | 1.01 - 1.39 | 4.8      |
|                                  | OS  | 1.50         | 1.20e-04  | 1.22 - 1.84 | 15.04    |
| $\beta 2M$ ( $<4.8, \geq 4.8$ )  | PFS | 1.64         | 1.34e-9   | 1.40 - 1.93 | 37.45    |
|                                  | OS  | 2.27         | 1.94e-13  | 1.82 - 2.82 | 57.63    |
| Calcium ( $<11.13, \geq 11.13$ ) | PFS | 1.36         | 0.008     | 1.08 - 1.72 | 6.44     |
|                                  | OS  | 1.45         | 0.012     | 1.08 - 1.93 | 5.8      |
| eGFR ( $>48.1, \leq 48.1$ )      | PFS | 1.17         | 0.056     | 0.99 - 1.39 | 3.563    |
|                                  | OS  | 1.49         | 2.00e-04  | 1.2 - 1.84  | 13.29    |
| Hb ( $>12.3, \leq 12.3$ )        | PFS | 1.60         | 1.0e-4    | 1.26 - 2.03 | 17       |
|                                  | OS  | 2.54         | 9.60e-07  | 1.75 - 3.70 | 31.14    |
| MMRF Dataset ( $n = 900$ )       |     |              |           |             |          |
| Parameter                        |     | Hazard Ratio | $p >  z $ | 95% CI      | $\chi^2$ |
| Age ( $67 \leq, >67$ )           | PFS | 1.52         | 3.00e-05  | 1.25 - 1.86 | 16.81    |
|                                  | OS  | 2.05         | 1.10e-06  | 1.54 - 2.75 | 22.85    |
| Albumin ( $>3.6, \leq 3.6$ )     | PFS | 1.39         | 0.001     | 1.14 - 1.68 | 10.9     |
|                                  | OS  | 2.01         | 1.00e-05  | 1.49 - 2.72 | 21.68    |
| $\beta 2M$ ( $<4.8, \geq 4.8$ )  | PFS | 2.01         | 1.50e-12  | 1.65 - 2.44 | 48.26    |
|                                  | OS  | 2.71         | 2.65e-11  | 2.02 - 3.63 | 44.78    |
| Calcium ( $<11.13, \geq 11.13$ ) | PFS | 1.48         | 0.05      | 0.99 - 2.18 | 3.4      |
|                                  | OS  | 2.46         | 1.00e-04  | 1.56 - 3.89 | 12.01    |
| eGFR ( $>48.1, \leq 48.1$ )      | PFS | 1.89         | 1.61e-08  | 1.51 - 2.36 | 28.54    |
|                                  | OS  | 2.51         | 2.90e-09  | 1.86 - 3.41 | 31.21    |
| Hb ( $>12.3, \leq 12.3$ )        | PFS | 1.5          | 0.0013    | 1.17 - 1.92 | 11.2     |
|                                  | OS  | 1.56         | 0.02      | 1.06 - 2.28 | 5.75     |

Table S5: Multivariate analysis of Cox Proportional Hazards Model for MMIn dataset ( $n=1070$ )

| Parameter                        | PFS<br>( $\chi^2=54.26$ ) |           |           | OS<br>( $\chi^2=95.59$ ) |           |           |
|----------------------------------|---------------------------|-----------|-----------|--------------------------|-----------|-----------|
|                                  | Hazard Ratio              | $p >  z $ | 95% CI    | Hazard Ratio             | $p >  z $ | 95% CI    |
| Age ( $\leq 67, >67$ )           | 1.31                      | 0.02      | 1.03-1.66 | 1.83                     | 1.00e-05  | 1.40-2.40 |
| Albumin ( $>3.6, \leq 3.6$ )     | 1.02                      | 0.80      | 0.86-1.20 | 1.17                     | 0.15      | 0.94-1.45 |
| $\beta 2M$ ( $<4.8, \geq 4.8$ )  | 1.58                      | 3.37e-07  | 1.32-1.88 | 1.98                     | 8.90e-09  | 1.57-2.5  |
| Calcium ( $<11.13, \geq 11.13$ ) | 1.28                      | 0.04      | 1.00-1.62 | 1.23                     | 0.15      | 0.92-1.66 |
| eGFR ( $>48.1, \leq 48.1$ )      | 0.89                      | 0.22      | 0.74-1.07 | 1.01                     | 0.96      | 0.80-1.26 |
| Hb ( $>12.3, \leq 12.3$ )        | 1.38                      | 0.01      | 1.06-1.78 | 1.87                     | 1.70e-03  | 1.26-2.76 |

Table S6: Multivariate analysis of Cox Proportional Hazards Model for MMRF dataset ( $n=900$ )

| Parameter                         | PFS<br>( $\chi^2=67.12$ ) |           |           | OS<br>( $\chi^2=82.43$ ) |           |           |
|-----------------------------------|---------------------------|-----------|-----------|--------------------------|-----------|-----------|
|                                   | Hazard Ratio              | $p >  z $ | 95% CI    | Hazard Ratio             | $p >  z $ | 95% CI    |
| Age ( $\leq 67, > 67$ )           | 1.33                      | 5.90e-03  | 1.08-1.63 | 1.66                     | 8.60e-04  | 1.23-2.23 |
| Albumin ( $> 3.6, \leq 3.6$ )     | 1.24                      | 0.03      | 1.01-1.52 | 1.89                     | 9.00e-05  | 1.37-2.60 |
| $\beta 2M$ ( $< 4.8, \geq 4.8$ )  | 1.60                      | 1.00e-04  | 1.26-2.04 | 1.81                     | 1.40e-03  | 1.26-2.60 |
| Calcium ( $< 11.13, \geq 11.13$ ) | 1.03                      | 0.85      | 0.69-1.56 | 1.57                     | 0.06      | 0.96-2.53 |
| eGFR ( $> 48.1, \leq 48.1$ )      | 1.33                      | 0.03      | 1.02-1.73 | 1.61                     | 0.011     | 1.11-2.33 |
| Hb ( $> 12.3, \leq 12.3$ )        | 1.09                      | 0.51      | 0.84-1.43 | 0.84                     | 0.41      | 0.55-1.27 |

Table S7: Classification accuracy obtained when J48 decision tree classifier was trained on training data ( $n=716$ ) of MMIn dataset. Risk stages obtained via BIRCH clustering were used as ground truth labels. Decision tree was first trained using all the parameters and further trained consecutively excluding one of the parameters. (alb-albumin; cal-calcium; Hb-Hemoglobin)

| Parameters included                  | Parameter excluded | Accuracy (%) |
|--------------------------------------|--------------------|--------------|
| age, alb, $\beta 2M$ , cal, eGFR, Hb | -                  | <b>96.5</b>  |
| age, alb, $\beta 2M$ , eGFR, Hb      | Calcium            | 94.27        |
| alb, $\beta 2M$ , cal, eGFR, Hb      | Age                | 89.52        |
| age, alb, $\beta 2M$ , cal, Hb       | eGFR               | 86.59        |
| age, alb, $\beta 2M$ , cal, eGFR     | Hb                 | 86.45        |
| age, alb, cal, eGFR, Hb              | $\beta 2M$         | 84.77        |
| age, $\beta 2M$ , cal, eGFR, Hb      | Albumin            | 82.68        |

Table S8: Staging systems along with the parameters used

| Staging System | ISS                   | RISS             | MRS                                                            |
|----------------|-----------------------|------------------|----------------------------------------------------------------|
| Parameters     | $\beta 2M$<br>Albumin | ISS<br>CA<br>LDH | Age<br>Albumin<br>$\beta 2M$<br>Calcium<br>eGFR<br>Haemoglobin |

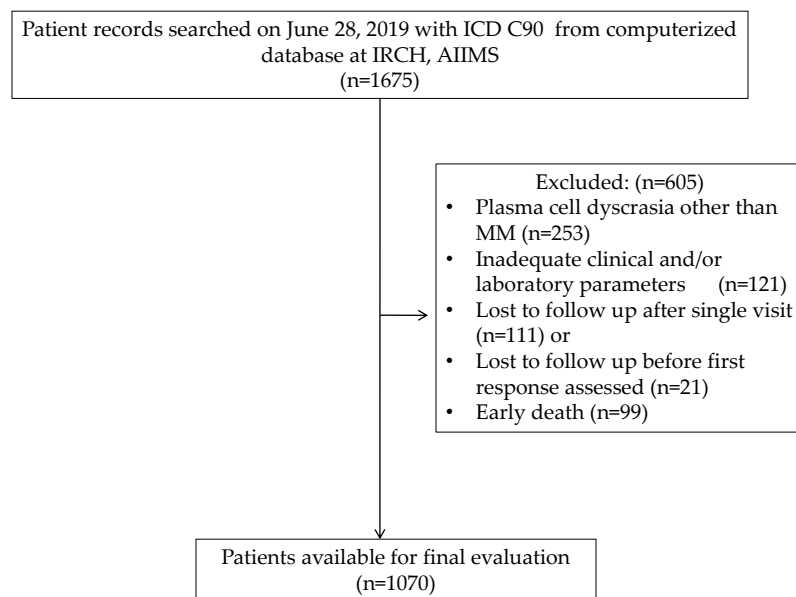

Figure S1: Flowchart of Study Population

## Modified Risk Staging System (MRS) calculator for Multiple Myeloma (version 1.0)

Developed by: Akanksha Farswan, PhD Student, SBILab, IIT Delhi

Description: A robust AI-supported risk-staging system for MM patients that utilizes easy to acquire key prognostic parameters. It predicts the risk stage of a patient depending on the values of the six parameters- age, albumin, b2m, hemoglobin, calcium and eGFR.

- Its utility has been validated for Newly diagnosed Multiple Myeloma (NDMM) patients.
- It is a reliable and efficient tool for upfront risk stratification of MM patients.

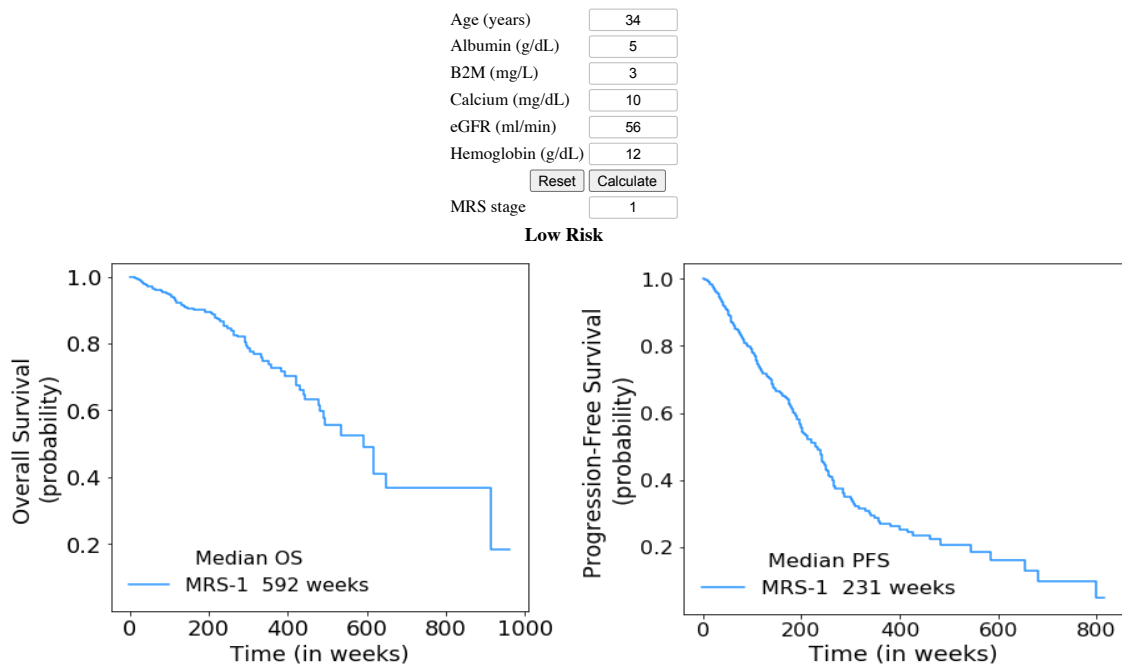

Figure S2: Online version of MRS calculator
